# Supplementary material for: Comparative Analysis of Pulmonary Lesions in Pediatric COVID-19: Insights from Chest CT Scans and Systematic Review Correlations
Source: Research Square preprint supplement (doi:10.21203/rs.3.rs-6113482/v1), 2026-02-12
Supplement: Supplementary file 1 [file a82ea5d799417fa46b615ecf.docx]

Table 2 Association between radiological patterns, zone involvement, lesion types, and lung involvement volumes. P-values were calculated to assess the significance of ground glass opacities and consolidation patterns in chest CT scans. N/A: Not Applicable.

| **Variable** | **p-value (Ground Glass)** | **p-value (Consolidation)** |
| --- | --- | --- |
| **Zone Involvement (No Involvement)** | N/A | N/A |
| **Zone Involvement (Upper Zone)** | ≈ 1.000 | ≈ 1.000 |
| **Zone Involvement (Lower Zone)** | < 0.001 | ≈ 0.002 |
| **Zone Involvement (Entire Lung)** | ≈ 0.054 | < 0.001 |
| **Lesions Type (Doesn't have)** | N/A | N/A |
| **Lesions Type (Central)** | ≈ 0.054 | ≈ 0.106 |
| **Lesions Type (Peripheral)** | < 0.001 | < 0.001 |
| **Lesions Type (Both)** | ≈ 0.054 | < 0.001 |
| **Lung Involvement Volume (No Involvement)** | N/A | N/A |
| **Lung Involvement Volume (Less than 25%)** | < 0.001 | ≈ 0.134 |
| **Lung Involvement Volume (25% to 50%)** | ≈ 0.054 | ≈ 1.000 |
| **Lung Involvement Volume (50% to 75%)** | ≈ 0.054 | ≈ 1.000 |
| **Lung Involvement Volume (More than 75%)** | ≈ 1.000 | ≈ 1.000 |
