# Supplementary material for: Comparative Analysis of Pulmonary Lesions in Pediatric COVID-19: Insights from Chest CT Scans and Systematic Review Correlations
Source: Research Square preprint supplement (doi:10.21203/rs.3.rs-6113482/v1), 2026-02-12
Supplement: Supplementary file 2 [file cbc840519d0c3e7941cb195c.docx]

Table 1: Comparison of Radiological Findings in Pediatric COVID-19: Data from Our Study and Other Published Studies

| Our Study | | | Other Studies | | | | | | | |
| --- | --- | --- | --- | --- | --- | --- | --- | --- | --- | --- |
| Feature | | Number of Patients (%) | Najafinejad et al.(19) | Ghodsi  Et al.(20) | Ma et al.(21) | Shelmerdine  Et al.(22) | Bayramoglu  Et al.(23) | Palabiyik  Et al.(24) | Kumar  Et al.(25) | Yang  Et al.(26) |
| Ground-Glass Opacities | | | | | | | | | | |
| Yes | | 39 (92.9%) | 100% | 71.4% | 67% | 62.4% | 46% | 41% | 40% | 12.1% |
| Consolidation | | | | | | | | | | |
| Yes | | 23 (54.8%) | 64% | 28.57% | 37% | - | 16.2% | 36% | 67% | 8.2% |
| Lung Zone Involvement | | | | | | | | | | |
| No Involvement | | 3 (7.1%) | 0% |  | 14% | 34% | - | - | 33% | 11.4% |
| Upper Zone | | 1 (2.4%) | - | - | - | 17.2% | - | - | - | - |
| Lower Zone | | 29 (69.0%) | - | - | 65% | 44.4% | - | 69% | - | - |
| Entire Lung | | 9 (21.4%) | - | - | - | 4.4% | - | - | - | - |
| Lesion Type | | | | | | | | | | |
| Central | | 3 (7.14%) | - | - | - | - | - | - | - | - |
| Peripheral | | 19 (45.24%) | - | - | 95% | - | More Peripheral | - | - | More Peripheral |
| Both (Central and Peripheral) | | 17 (40.48%) | - | - | - | - | - | 55% | - | - |
| No Lesion | | 3 (7.14%) | - | - | - | - | - | - | - | - |
| Most Common Affected Lobes | | | | | | | | | | |
| Left Lower Lobe (LL) | | 15 (38.1%) | - | | | | | | | |
| Left Superior Lobe (LS) | | 4 (9.5%) |
| Right Lower Lobe (RL) | | 11 (26.2%) |
| Right Middle Lobe (RM) | | 5 (11.9%) |
| Right Superior Lobe (RS) | | 4 (9.5%) |
| No Involvement | | 3 (4.8%) |
| Number of Affected Lobes | | | | | | | | | | |
| Zero | | 3 (7.1%) | 0% | - | | | | | | |
| 1 | | 4 (9.5%) | 19.04% |
| 2 | | 11 (26.2%) |
| 3 | | 12 (28.6%) | 33.35% |
| 4 | | 7 (16.7%) |
| 5 | | 5 (11.9%) | 47.61% |
| Pleural Effusion | | | | | | | | | | |
| Yes | | 2 (4.8%) | 9% | 7.1 % | - | 1.2% | - | - | - | - |
| Lung Involvement Volume | | | | | | | | | | |
| Zero | | 3 (7.1%) | 0 % | - | | | | | | |
| Less than 25% | 20 (47.6%) | | 20 (47.6%) |
| 25% to 50% | 15 (35.7%) | | 15 (35.7%) |
| 50% to 75% | 3 (7.1%) | | 3 (7.1%) |
| More than 75% | | 1 (2.4%) | 4.55% |
| Pericardial Effusion | | | | | | | | | | |
| Yes | | 0 (0%) | - | | | | | | | |
| Mediastinal Lymphadenopathy | | | | | | | | | | |
| Yes | | 0 (0%) | - | - | - | 0 % | 8% | - | - | - |
| Additional Findings | | | | | | | | | | |
| Liver Lesions  0 (0%) | | | - | | | | | | | |
| Bone Lesions  0 (0%) | | | - | | | | | | | |
